# Supplementary material for: Choline Hydrogen Dicarboxylate Ionic Liquids by X-ray Scattering, Vibrational Spectroscopy and Molecular Dynamics: H-Fumarate and H-Maleate and Their Conformations
Source: MDPI journal article supplement (doi:10.3390/molecules25214990), 2020-10-28
Supplement: s1 [file s1]

Table S1. Vibrational frequencies [ $\text{cm}^{-1}$ ] calculated for the isolated and ion paired H-fumarate anion.

| isolated anion |                                                                                                    | paired anion |
|----------------|----------------------------------------------------------------------------------------------------|--------------|
| Frequency      | PED <sup>[a]</sup>                                                                                 | Frequency    |
| 30             | $\tau\text{C1C2}$ , 83                                                                             |              |
| 108            | $\tau\text{C2C3}$ , $\delta\text{O1C1C2}$ ; 70, 17                                                 |              |
| 125            | $\tau\text{C3C4}$ , $\delta\text{C1C2C3}$ , $\delta\text{C2C3C4}$ ; 41, 23, 16                     |              |
| 166            | $\tau\text{C3C4}$ , $\delta\text{C2C3C4}$ , $\delta\text{C1C2C3}$ ; 34, 20, 15                     |              |
| 261            | $\delta\text{C1C2C3}$ , $\delta\text{C2C3C4}$ , $\nu\text{C1C2}$ ; 24, 22, 17                      | 304          |
| 388            | $\delta\text{O1C1C2}$ , $\delta\text{O4C4C3}$ ; 41, 13                                             | 394          |
| 455            | $\delta\text{O4C4C3}$ , $\delta\text{O1C1C2}$ ; 47, 11                                             | 561          |
| 550            | $\tau\text{C4O4}$ ; 86                                                                             | 572          |
| 606            | $\delta\text{O4'C4O4}$ , $\delta\text{O1'C1O1}$ ; 56, 17                                           | 620          |
| 664            | $\omega\text{O1'C1O1}$ , $\delta\text{O1'C1O1}$ , $\delta\text{C4C3C2}$ ; 22, 21, 13               | 723          |
| 740            | $\omega\text{O4'C4O4}$ , $\delta\text{O1'C1O1}$ ; 29, 17                                           | 681          |
| 781            | $\omega\text{O4'C4O4}$ , $\omega\text{O1'C1O1}$ ; 41, 28                                           | 802          |
| 882            | $\gamma\text{C2H}$ , $\tau\text{C3H}$ ; 59, 11                                                     | 936          |
| 910            | $\nu\text{C1C2}$ , $\nu\text{C4O4}$ , $\delta\text{O1'C1O1}$ ; 39, 18, 14                          | 935          |
| 974            | $\nu\text{C3C4}$ , $\delta\text{C1C2C3}$ ; 25, 17                                                  | 970          |
| 994            | $\gamma\text{C3H}$ , $\gamma\text{C2H}$ ; 68, 20                                                   | 1026         |
| 1107           | $\nu\text{C4O4}$ , $\delta\text{HO4C4}$ , $\nu\text{C3C4}$ , $\delta\text{HC3C4}$ ; 37, 23, 17, 11 | 1129         |
| 1245           | $\delta\text{HC2C3}$ , $\delta\text{HC3C4}$ , $\delta\text{HO4C4}$ ; 42, 24, 20                    | 1236         |
| 1284           | $\delta\text{HC2C3}$ , $\delta\text{HO4C4}$ , $\delta\text{HC3C4}$ ; 34, 19, 15                    | 1288         |
| 1343           | $\delta\text{HC3C4}$ , $\delta\text{HO4C4}$ , $\nu\text{C2C3}$ ; 24, 20, 13                        | 1356         |
| 1365           | $\nu\text{C1O1'}$ , $\nu\text{C1O1}$ , $\delta\text{O1'C1O1}$ ; 40, 32, 10                         | 1387         |
| 1627           | $\nu\text{C2C3}$ , $\delta\text{HC3C4}$ ; 65, 10                                                   | 1698         |
| 1662           | $\nu\text{C1O1}$ , $\nu\text{C1O1'}$ ; 53, 43                                                      | 1615         |
| 1748           | $\nu\text{C4O4'}$ ; 76                                                                             | 1780         |
| 3146           | $\nu\text{C2H}$ ; 99                                                                               | 3181         |
| 3181           | $\nu\text{C3H}$ ; 99                                                                               | 3200         |
| 3778           | $\nu\text{O4H}$ ; 100                                                                              | 3768         |

<sup>[a]</sup> PED calculated for the isolated anion.  $\nu$ , stretching;  $\delta$ , bending;  $\tau$ , torsion;  $\omega$ , wagging,  $\gamma$ , out of plane bending.
