# Supplementary material for: Choline Hydrogen Dicarboxylate Ionic Liquids by X-ray Scattering, Vibrational Spectroscopy and Molecular Dynamics: H-Fumarate and H-Maleate and Their Conformations
Source: MDPI journal article supplement (doi:10.3390/molecules25214990), 2020-10-28
Supplement: s1 [file s1]

Table S2. Vibrational frequencies [ $\text{cm}^{-1}$ ] calculated for the isolated and ion paired H-maleate anion.

| isolated anion |                                                                                                                       | paired anion |
|----------------|-----------------------------------------------------------------------------------------------------------------------|--------------|
| Frequency      | PED <sup>[a]</sup>                                                                                                    | Frequency    |
| 56             | $\tau\text{C1C2}$ , $\tau\text{C3C4}$ ; 71, 18                                                                        |              |
| 102            | $\tau\text{C3C4}$ , $\tau\text{C1C2}$ ; 57, 24                                                                        |              |
| 279            | $\tau\text{C2C3}$ ; 69                                                                                                | 295          |
| 281            | $\delta\text{C2C3C4}$ , $\delta\text{C1C2C3}$ , $\delta\text{O1C1O1'}$ ; 38, 15, 12                                   | 292          |
| 309            | $\delta\text{C1C2C3}$ , $\delta\text{O1C1C2}$ , $\delta\text{O4C4C3}$ ; 35, 29, 17                                    | 317          |
| 402            | $\delta\text{O4C4C3}$ , $\delta\text{O1C1C2}$ , $\nu\text{C2C3}$ , $\nu\text{C1C2}$ ; 23, 20, 12, 12                  | 423          |
| 569            | $\delta\text{O4C4O4'}$ ; 60                                                                                           | 610          |
| 592            | $\tau\text{C3C4}$ , $\omega\text{O1C1O1'}$ , $\omega\text{O4'C4O4}$ , $\tau\text{C2C3}$ ; 29, 25, 23, 18              | 594          |
| 637            | $\nu\text{C1C2}$ , $\delta\text{O1C1O1'}$ , $\delta\text{O4C4C3}$ ; 36, 28, 23                                        | 641          |
| 777            | $\nu\text{C3C4}$ , $\delta\text{O1C1C2}$ , $\delta\text{C2C3C4}$ ; 26, 25, 19                                         | 791          |
| 802            | $\omega\text{O4'C4O4}$ , $\omega\text{O1C1O1'}$ , $\tau\text{C2C3}$ ; 37, 35, 16                                      | 811          |
| 873            | $\omega\text{O1C1O1'}$ , $\gamma\text{C2H}$ , $\omega\text{O4'C4O4}$ , $\gamma\text{C3H}$ ; 28, 25, 24, 18            | 886          |
| 875            | $\delta\text{O1'C1O1}$ , $\nu\text{C3C4}$ , $\delta\text{C2C3C4}$ ; 30, 12, 11                                        | 875          |
| 945            | $\nu\text{C1C2}$ , $\delta\text{C1C2C3}$ , $\nu\text{C4O4}$ , $\nu\text{C3C4}$ , $\nu\text{C1O1}$ ; 20, 16, 15, 15,12 | 950          |
| 1012           | $\gamma\text{C3H}$ , $\gamma\text{C2H}$ ; 46, 44                                                                      | 1035         |
| 1197           | $\nu\text{C4O4}$ , $\nu\text{C1O1}$ , $\nu\text{O4H}$ ; 27, 21, 14                                                    | 1216         |
| 1210           | $\tau\text{C4O4}$ ; 98                                                                                                | 1039         |
| 1214           | $\delta\text{HC2C3}$ , $\delta\text{HC3C4}$ ; 42, 35                                                                  | 1218         |
| 1367           | $\nu\text{O4H}$ , $\nu\text{C1O1}$ , $\nu\text{C1O1'}$ ; 27, 16                                                       | 1367         |
| 1387           | $\delta\text{HC3C4}$ , $\delta\text{HC2C3}$ ; 44, 36                                                                  | 1415         |
| 1555           | $\nu\text{C1O1'}$ , $\nu\text{O4H}$ ; 39, 25                                                                          | 1606         |
| 1639           | $\delta\text{HO4C4}$ , $\nu\text{C4O4'}$ , $\nu\text{C2C3}$ ; 35, 31, 14                                              | 1561         |
| 1655           | $\nu\text{C2C3}$ , $\delta\text{HO4C4}$ ; 58, 20                                                                      | 1668         |
| 1741           | $\delta\text{HO4C4}$ , $\nu\text{C4O4'}$ , $\nu\text{C1O1'}$ ; 29, 21, 20                                             | 1772         |
| 1814           | $\nu\text{O4H}$ , $\nu\text{C4O4'}$ , $\nu\text{C1O1}$ ; 40, 17, 13                                                   | 2805         |
| 3128           | $\nu\text{C2H}$ , $\nu\text{C3H}$ ; 60, 40                                                                            | 3154         |
| 3154           | $\nu\text{C3H}$ , $\nu\text{C2H}$ ; 60, 40                                                                            | 3175         |

<sup>[a]</sup> PED calculated for the isolated anion.  $\nu$ , stretching;  $\delta$ , bending;  $\tau$ , torsion;  $\omega$ , wagging,  $\gamma$ , out of plane bending.
